# Supplementary material for: Structure–function analysis of the GmRIC1 signal peptide and CLE domain required for nodulation control in soybean
Source: PubMed Central journal article supplement — J Exp Bot. 2013 Feb 5;64(6):1575–85. doi: 10.1093/jxb/ert008 (PMC3617822; doi:10.1093/jxb/ert008), 2013-02-05
Supplement: supp_ert008_jexbot090928_file001.pdf [file supp_ert008_jexbot090928_file001.pdf]

**Table S1.** Primer sequences for Site-Directed Mutagenesis (SDM)

| Amino acid no.<br>on <i>GmRIC1</i> | Mutation  |      | Primer sequence (mutation)                         |
|------------------------------------|-----------|------|----------------------------------------------------|
| 31                                 | L31A      | For. | TGCAGGCTAGTAAT <b>GCC</b> CATGGCCATCC (CTC-GCC)    |
|                                    |           | Rev. | GGATGGCCATG <b>GGC</b> ATTACTAGCCTGCA (GAG-GGC)    |
| 58                                 | K58A      | For. | AGACGACCTATCAG <b>CGC</b> CATATACATGTTC (AAG-GCG)  |
|                                    |           | Rev. | GAACATGTATATG <b>CGC</b> TGATAGGTCGTCT (CTT-CGC)   |
| 77                                 | R1E       | For. | GATGGAAATACGCAT <b>GA</b> GCTCGCACCAGAGG (AGG-GAG) |
|                                    |           | Rev. | CCTCTGGTGCGAGC <b>TC</b> ATGCGTATTTCCATC (CCT-CTC) |
| 78                                 | L2A       | For. | GGAAATACGCATAGG <b>GC</b> CGCACCAGAGGGAC (CTC-GCC) |
|                                    |           | Rev. | GTCCCTCTGGTGCG <b>GC</b> CCTATGCGTATTTCC (GAG-GGC) |
| 78                                 | L2N       | For. | GGAAATACGCATAGG <b>AAC</b> GCACCAGAGGGAC (CTC-AAC) |
|                                    |           | Rev. | GTCCCTCTGGTG <b>GTT</b> CCTATGCGTATTTCC (GAG-GTT)  |
| 78                                 | L2R       | For. | GGAAATACGCATAGG <b>CGC</b> GCACCAGAGGGAC (CTC-CGC) |
|                                    |           | Rev. | GTCCCTCTGGTG <b>CGC</b> CCTATGCGTATTTCC (GAG-GCG)  |
| 79                                 | A3D       | For. | ACGCATAGGCTC <b>GAT</b> CCAGAGGGACCAG (GCA-GAT)    |
|                                    |           | Rev. | CTGGTCCCTCTGG <b>ATC</b> GAGCCTATGCGT (TGC-ATC)    |
| 80                                 | P4R       | For. | GCATAGGCTCGCA <b>AG</b> AGAGGGACCAGATCC (CCA-AGA)  |
|                                    |           | Rev. | GGATCTGGTCCCTCT <b>CT</b> TGCGAGCCTATGC (TGG-TCT)  |
| 81                                 | E5A       | For. | ATAGGCTCGACCA <b>GCG</b> GGACCAGATCCTC (GAG-GCG)   |
|                                    |           | Rev. | GAGGATCTGGTCCC <b>G</b> CTGGTGCGAGCCTAT (CTC-CGC)  |
| 81                                 | E5R       | For. | ATAGGCTCGACCA <b>AGG</b> GGACCAGATCCTC (GAG-AGG)   |
|                                    |           | Rev. | GAGGATCTGGTCC <b>CCT</b> TGGTGCGAGCCTAT (CTC-CCT)  |
| 81                                 | E5T       | For. | ATAGGCTCGACCA <b>ACG</b> GGACCAGATCCTC (GAG-ACG)   |
|                                    |           | Rev. | GAGGATCTGGTCC <b>CGT</b> TGGTGCGAGCCTAT (CTC-TGC)  |
| 81                                 | E5V       | For. | ATAGGCTCGACCA <b>GTG</b> GGACCAGATCCTC (GAG-GTG)   |
|                                    |           | Rev. | GAGGATCTGGTCC <b>CAC</b> TGGTGCGAGCCTAT (CTC-CAC)  |
| 82                                 | G6A       | For. | GCTCGCACCAGAG <b>GCA</b> CCAGATCCTCATC (GGA-GCA)   |
|                                    |           | Rev. | GATGAGGATCTGGT <b>G</b> CCTCTGGTGCGAGC (TCC-TGC)   |
| 83                                 | P7A       | For. | CTCGCACCAGAGGG <b>G</b> CAGATCCTCATCATA (CCA-GCA)  |
|                                    |           | Rev. | TATGATGAGGATCTG <b>C</b> TCCCTCTGGTGCGAG (TGG-TGC) |
| 84                                 | D8A       | For. | CACCAGAGGGACCAG <b>GCT</b> CCTCATCATAAT (GAT-GCT)  |
|                                    |           | Rev. | ATTATGATGAGG <b>G</b> CTGGTCCCTCTGGTG (ATC-AGC)    |
| 85                                 | P9A       | For. | AGAGGGACCAGAT <b>GCT</b> CATCATAATTTTG (CCT-GCT)   |
|                                    |           | Rev. | CAAATTATGATGAG <b>C</b> ATCTGGTCCCTCT (AGG-AGC)    |
| 86                                 | H10A      | For. | AGGGACCAGATCCT <b>GCT</b> CATAATTTTGCAAC (CAT-GCT) |
|                                    |           | Rev. | GTTGCAAAATTATG <b>AGC</b> AGGATCTGGTCCCT (ATG-AGC) |
| 87                                 | H11A      | For. | ACCAGATCCTCAT <b>GCT</b> AATTTTGCAACACC (CAT-GCT)  |
|                                    |           | Rev. | GGTGTGCAAAATT <b>AGC</b> ATGAGGATCTGGT (ATG-AGC)   |
| 88                                 | N12A      | For. | AGATCCTCATCAT <b>GCT</b> TTTGCAACACCAC (AAT-GCT)   |
|                                    |           | Rev. | GTGGTGTGCAAA <b>AGC</b> ATGATGAGGATCT (ATT-AGC)    |
| 89                                 | F89A      | For. | ATCCTCATCATAAT <b>GCT</b> GCAACACCACCAAG (TTT-GCT) |
|                                    |           | Rev. | CTTGGTGGTGTG <b>AGC</b> ATTATGATGAGGAT (AAA-AGC)   |
| 89                                 | F89*      | For. | ATCCTCATCATAAT <b>TAG</b> GCAACACCACCAAG (TTT-TAG) |
|                                    |           | Rev. | CTTGGTGGTGTG <b>CTA</b> AATTATGATGAGGAT (AAA-CTA)  |
| 9293                               | PP92/93AA | For. | ATAATTTTGCAAC <b>GCAGCA</b> AGAAACTAAAG (CCA-GCA)  |
|                                    |           | Rev. | CTTTAGTTTCT <b>TGCTGC</b> TGTTGCAAAATTAT (TGG-TGC) |

Table S2. Primers for domain swap constructs

| Construct | Primer | Primer Sequence                                                                                  |
|-----------|--------|--------------------------------------------------------------------------------------------------|
| RIC1      | Fwd    | GCGCGAATTCCC GCATGGCAAATGCAA                                                                     |
|           | Rev    | GCGCGGTACCCGAAATCTACTCCAAACAAAGCTACTT                                                            |
| NIC1      | Fwd    | GCGCCTCGAGATGCTTGAAGCCTTGGGG                                                                     |
|           | Rev    | GCGCGGTACCTTAGTGATGTTTTTGATCAGGTCC                                                               |
| RNN       | 1      | RIC1 Fwd                                                                                         |
|           | 2      | CCTCAAGAGAACTAGCCTGCAAAGTCAT                                                                     |
|           | 3      | GCAGGCTAGTTCTCTTGAGGCATTCATAG                                                                    |
|           | 4      | NIC1 Rev                                                                                         |
| NRRR      | 1      | NIC1 Fwd                                                                                         |
|           | 2      | CATGGAGATTACGACTTTCAAGCTTGGA                                                                     |
|           | 3      | TGAAAGTCGTAATCTCCATGGCCATCCC                                                                     |
|           | 4      | RIC1 Rev                                                                                         |
| NNNR      | 1      | NIC1 Fwd                                                                                         |
|           | 2      | GCGCGGTACCTTAGTTTTCTTGGTGGTGTGCAAAGTGAT<br>GTTTTTGATCAGGTCCT                                     |
| NNRR      | 1      | NIC1 Fwd                                                                                         |
|           | 2      | GTGCGAGCCTTTTGGACACTCTAGGATT                                                                     |
|           | 3      | AGTGTCCAAAAGGCTCGCACCAGAGGGA                                                                     |
|           | 4      | RIC1 Rev                                                                                         |
| RRN       | 1      | RIC1 Fwd                                                                                         |
|           | 2      | GCGCGGTACCTTAGTGATGTTTTTGATCAGGTCCTCCAG<br>GGCTTAGTCTATGCGTATTTCCATCTTTG                         |
| RRNR      | 1      | RIC1 Fwd                                                                                         |
|           | 2      | GCGCGGTACCTTAGTTTTCTTGGTGGTGTGCAAAGTGAT<br>GTTTTTGATCAGGTCCTCCAGGGCTTAGTCTATGCGTATT<br>TCCATCTTT |
| NNR       | 1      | NIC1 Fwd                                                                                         |
|           | 2      | GCGCGGTACCTTAATTATGATGAGGATCTGGTCCCTCTG<br>GTGCGAGCCTTTTGGACACTCTAGGATTT                         |
